# Supplementary material for: Pretreatment central quality control for craniospinal irradiation in non-metastatic medulloblastoma
Source: Springer Nature journal article supplement (doi:10.1007/s00066-020-01707-8), 2020-11-23

### Supplementary figure 1

Typical dose distributions of CSI techniques

high precision photon

volumetric modulated arc therapy [VMAT]

proton beam therapy

3d conformal

lateral opposing fields for brain and posterior fields for spine

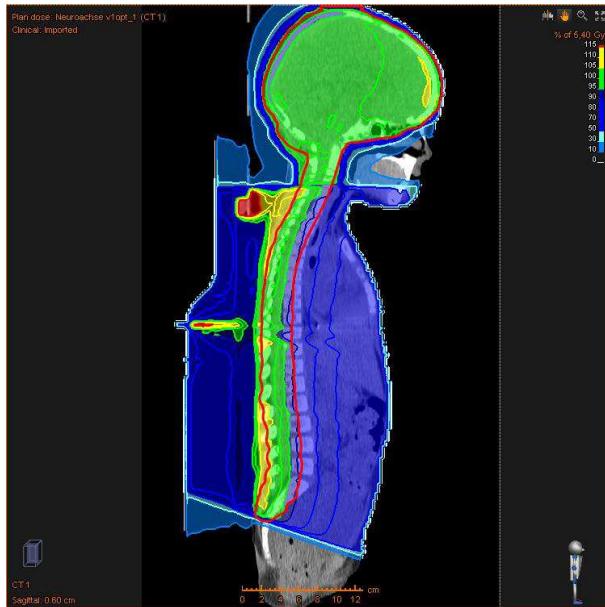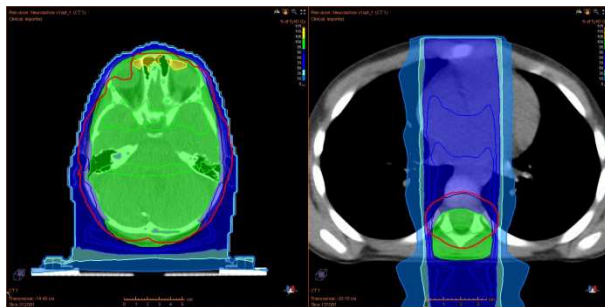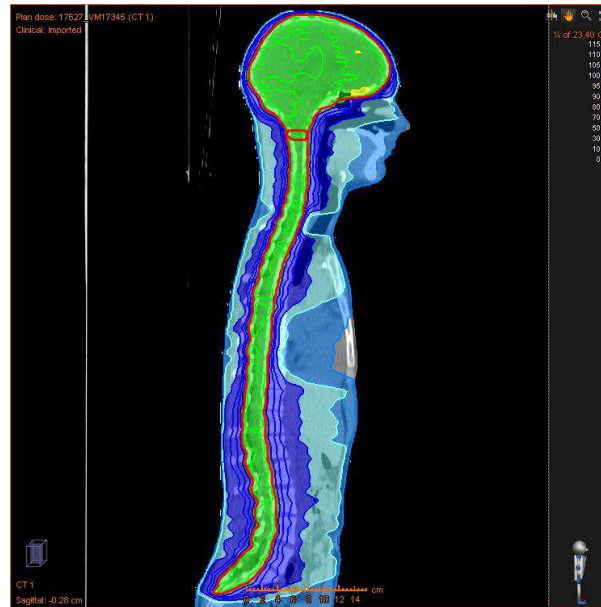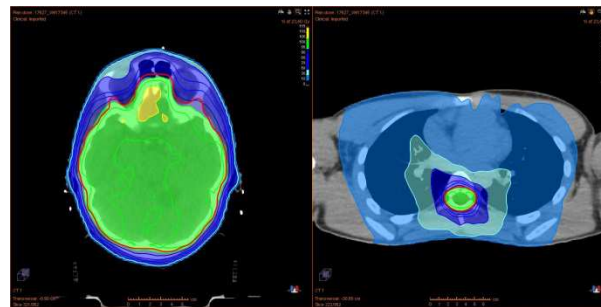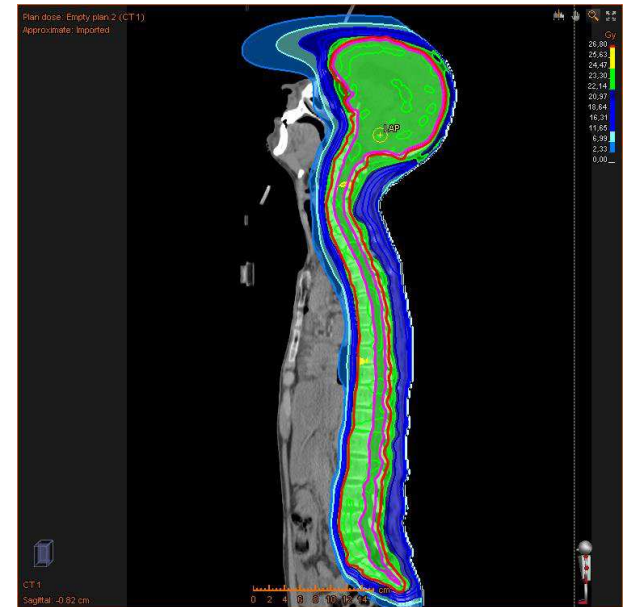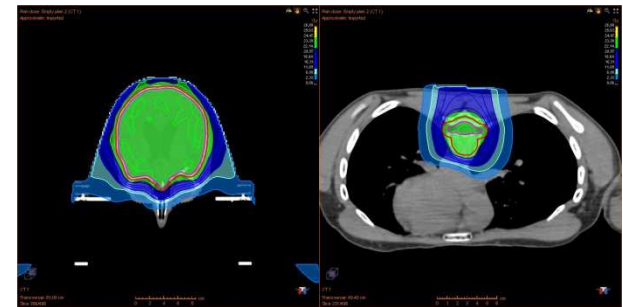

Supplement: MOESM1 [file 18615002]
